# Supplementary material
Source: PubMed Central journal article supplement (PMC4657822)
Supplement: ASN.2014010118_ASN2014010118SupplementaryData.pdf [file ASN.2014010118_ASN2014010118SupplementaryData.pdf]

02/25/15

## Supplemental Information (SI)

**Title:** P2Y<sub>12</sub>-R Localizes in Rat Renal Collecting Duct, and its Blockade Augments AVP Action and Alleviates Lithium-induced NDI

**Authors:** Yue Zhang, Janos Peti-Peterdi, Christa E. Müller, Noel G. Carlson, Younis Baqi, David L. Strasburg, Kristina M. Heiney, Kari Villanueva, Donald E. Kohan, Bellamkonda K. Kishore

### Materials and Methods:

**Rationale for the Dose of Clopidogrel Used:** Drug dosage translation across species is not straightforward, and is governed by certain factors, such as body surface area (BSA) and metabolic activity of the species among others<sup>1</sup>. Metabolic activity of the species is known to influence the pharmacokinetics of drugs. Due to these inherent qualities of the species, often a dose that works well in humans is ostensibly ineffective in animals, and a dose that works well in animals may be very toxic in humans (e.g., the toxicity of aminoglycosides and cisplatin on the kidney). We applied the following formula for dose translation based on BSA, which is used while developing new drugs for clinical use<sup>2</sup>.

| Formula for Dose Translation Based on BSA            |                       |           | Species                                                                                        | Weight (kg) | Body Surface Area (BSA) (m <sup>2</sup> ) | K <sub>m</sub> factor<br>Weight (kg) / BSA (m <sup>2</sup> ) |
|------------------------------------------------------|-----------------------|-----------|------------------------------------------------------------------------------------------------|-------------|-------------------------------------------|--------------------------------------------------------------|
| HED (mg/kg) =                                        | Animal Dose (mg/kg) x | Animal Km | Adult Human                                                                                    | 60          | 1.6                                       | 37                                                           |
|                                                      |                       | Human Km  | Rat                                                                                            | 0.15        | 0.025                                     | 6                                                            |
|                                                      |                       |           | Mouse                                                                                          | 0.02        | 0.007                                     | 3                                                            |
| HED of clopidogrel is 75 mg/day = 1.25 mg/kg bw/day. |                       |           | Values based on data from FDA Draft Guidelines (2002), cited by Reagan-Shaw et al <sup>2</sup> |             |                                           |                                                              |

By substituting the 20 mg/kg dose we gave to Sprague-Dawley rats as well as the corresponding K<sub>m</sub> values on the right side of the above equation we get a value of 3.24 on the left side, which is 2.6-fold higher than the HED (human effective dose) of clopidogrel. A higher dose of clopidogrel (40 mg/kg bw/day) was used in Brattleboro rats to ensure an unequivocal outcome, whether positive or negative. The dose of clopidogrel given in the wild type and P2Y<sub>2</sub>-R knockout mice (80 mg/kg

bw/day) is approximately 5-fold higher than the HED. This higher dose ensured detection of off-target effects of clopidogrel, if any, on P2Y<sub>2</sub> receptor. Furthermore, considering the fact that generally rodents, which have a higher metabolic activity, are resistant to many drugs the doses we gave are within the range used for animal studies. Furthermore, toxicological evaluation of clopidogrel showed that doses as high as 165 mg/kg bw/day for up to 4 weeks in rats were free from toxicity<sup>3</sup>.

**Composition of Culture Media Used for Primary Cultures of Rat IMCD Cells:** The modified defined medium consists of DMEM/Ham's F12 (1:1 vol/vol), 7 ng/ml sodium selenite, 5 µg/ml transferrin, 5 µg/ml insulin, 100 units/ml penicillin, 100 µg/ml streptomycin, 0.29 mg/ml L-glutamine, 5 nM triiodothyronine, 50 nM hydrocortisone, 15 ng/ml epidermal growth factor (EGF), 10 U/ml recombinant rat interferon-γ, and 10 µM dibutyryl cyclic AMP. The starvation medium consists of DMEM/Ham's F12 (1:1 vol/vol) and all the above, except EGF and interferon-γ.

**Lysates Human Platelets:** Dr. Andrew Weyrich laboratory (University of Utah, Salt Lake City, UT) kindly prepared and supplied whole cell lysates of human platelets. These were obtained in accordance with the Declaration of Helsinki with the approval of University of Utah Institutional Review Board (IRB). As previously described<sup>4,5</sup>, washed platelets were freshly isolated from healthy subject who consented to participate in the studies. Contaminating leukocytes were removed from the platelet preparations by CD45-positive selection, and purified platelets were lysed in RIPA buffer containing protease and phosphatase inhibitors.

**Primary Cultures of Mouse Microglial Cells:** Mouse microglial cultures were prepared from as described previously<sup>6</sup>. Briefly, brains were removed from 1 day old CD1 mice and cerebral cortical cultures were prepared after trypsinization of the tissue. Cells were seeded in plates pre-coated with poly-D-lysine in MEM containing 10% fetal bovine serum. Culture were grown for 7-9 days at

37°C, and the microglial cells were removed by shaking on an orbital shaker followed by centrifugation. Microglial cells thus obtained were suspended in neurobasal medium with 2% B27 supplement and plated on poly-D-lysine coated plates. For immunofluorescence microscopy, cells were rinsed and fixed in 2% paraformaldehyde in PBS, and permeabilized with 0.2% triton-X 100. Cells were treated with Image-it FX signal enhancer and prior to incubation with primary antibodies. Rat monoclonal antibody for CD11b was used to visualize microglia. Cells were incubated with combination of primary antibodies at 4°C overnight followed by fluorochrome-conjugated secondary antibodies. Propidium iodide was used to visualize cell nuclei. Sections were mounted with ProLong Gold anti-fade permanent mounting media. Personal Confocal Microscope PCM-2000 (NIKON) was used to acquire the images.

**Primary Cultures of Rat Hypothalamic Cells:** Clumps of live primary rat hypothalamic cells from micro-surgically dissected brains of day 18 embryonic rats were obtained from Neuromics (Edina, MN). Neuromics prepares these cells freshly and ships them in a nutrient rich medium that keeps the cells alive for up to 7 days under refrigeration. Immediately after receiving, the cells were processed as per the instructions provided by the Neuromics. Briefly, the cells were enzymatically disrupted by incubating with papain and mechanically dispersed by repeatedly passing through the tip of a sterile Pasteur pipette. Cells were collected by centrifugation, suspended in Neurobasal medium containing B27 and glutamine, and seeded into poly-D-lysine coated multi-well plates. Cells were incubated at 37°C for up to 7 days while changing the medium every 3<sup>rd</sup> day. On day 7, test agents, namely 2MeS-ADP (2-methylthio-adenosine diphosphate) and/or PSB-0739 were added to the culture wells and incubated for another 24 h. Thereafter, medium was removed and cells were collected into Trizol reagent for total RNA extraction.

## **References:**

1. Lin JH, Lu AYH: Role of pharmacokinetics and metabolism in drug discovery and development. *Pharmacol Rev* 49:403-449, 1997
2. Reagan-Shaw S, Nihal M, Ahmad N: Dose translation from animal to human studies revisited. *FASEB J* 22:659-661, 2007
3. Reist M, Roy-de Vos M, Montseny JP, Mayer JM, Carrupt PA, Berger Y, Testa B: Very slow chiral inversion of clopidogrel in rats: a pharmacokinetic and mechanistic investigation. *Drug Metab Disp* 28:1405-1410, 2000
4. Denis MM, Tolley ND, Bunting M, Schertz H, Jiang H, Lindemann S, Yost CC, Rubner FJ, Albertine KH, Swoboda KJ, Fratto CM, Tolley E, Kraiss LW, McIntyre TM, Zimmermann G, Weyrich AS: Escaping the nuclear confines: signal-dependent pre-mRNA splicing in anucleat platelets. *Cell* 122:379-391, 2005
5. Schwertz H, Rowley JW, Tolley ND, Campbell RA, Weyrich AS: Assessing protein synthesis by platelets. *Methods Mol Biol* 788:141-153, 2012
6. Carlson NG, Rojas MA, Black J-D, Redd JW, Hille J, Hill KE, Rose JW: Microglial inhibition of neuroprotection by antagonists of EP1 protstaglandin E2 receptor. *J Neuroinflam* 6:5 (1-16), 2009
7. Wildman SSP, Marks J, Turner CM, Yew-Booth L, Peppiatt-Wildman CM, King BF, Shirley DG, Wang W, Unwin RJ: Sodium-dependent regulation of renal amiloride sensitive currents by apical P2 receptors. *J Am Soc Nephrol* 19:731-742, 2008
8. Zhang Y, Nelson RD, Carlson NG, Kamerath CD, Kohan DE, Kishore BK: Potential role of purinergic signaling in lithium-induced nephrogenic diabetes insipidus. *Am J Physiol Renal Physiol* 296:F1194-F1201, 2009
9. Zhang Y, Kohan DE, Nelson RD, Carlson NG, Kishore BK: Potential involvement of P2Y<sub>2</sub> receptor in diuresis of postobstructive uropathy in rats. *Am J Physiol Renal Physiol* 298:F634-F642, 2010
10. Kishore BK, Krane CM, Miller RL, Shi H, Zhang P, Hemmert A, Sun R, Nelson RD: P2Y<sub>2</sub> receptor mRNA and protein expression is altered in inner medullas of hydrated and dehydrated rats: relevance to AVP-independent regulation of IMCD function. *Am J Physiol Renal Physiol* 288:F1164-F1172, 2005

11. Sun R, Miller RL, Hemmert AC, Zhang P, Shi H, Nelson RD, Kishore BK: Chronic dDAVP infusion in rats decreases the expression of P2Y<sub>2</sub> receptor in inner medulla and P2Y<sub>2</sub> receptor-mediated PGE<sub>2</sub> release by IMCD. *Am J Physiol Renal Physiol* 289:F768-F776, 2005
12. Tozaki-Saito H, Tsuda M, Miyata H, Ueda K, Kohsaka S, Inoue K: P2Y<sub>12</sub> receptors in spinal microglia are required for neuropathic pain after peripheral nerve injury. *J Neurosci* 28:4949-4956, 2008
13. Yue C, Ponsio TA, Fields RL, Giner H: Oxytocin and vasopressin gene expression and RNA splicing patterns in the rat supraoptic nucleus. *Physiol Genomics* 35(3):231-242, 2008

**Attachments:**

**Table S1:** Alignment of amino acid sequences of P2Y<sub>12</sub> receptor and related proteins with respect to the location of the immunizing peptide.

**Table S2:** Nucleotide sequences of primer pairs used in real-time PCR

**Fig S1:** Comparative evaluation of different P2Y<sub>12</sub>-R antibodies on human platelet preparations

**Fig S2:** Comparative immunofluorescence evaluation of specificity of P2Y<sub>12</sub>-R antibodies in microglial cells.

**Fig S3:** Immunofluorescence labeling of P2Y<sub>12</sub>-R in rat kidney using Alomone Labs' antibody.

**Fig S4:** Expression of P2Y<sub>12</sub>-R in hypothalamus and the effect of its blockade on AVP gene expression.

**Fig S5:** Effect of clopidogrel administration for 13 days in Sprague-Dawley rats.

**Fig S6:** Lack of interaction of clopidogrel with P2Y<sub>2</sub> receptor.

**Fig S7:** Lack of effect of clopidogrel in Brattleboro rats.

**Table S1: Alignment of amino acid sequences of P2Y<sub>12</sub> receptor and related proteins with respect to the location of the immunizing peptide**

| Protein                 | AA Residue | Amino Acid (AA) Residues |   |   |   |   |   |   |   |   |   |   |   |   |   |   |   | AA Residue |
|-------------------------|------------|--------------------------|---|---|---|---|---|---|---|---|---|---|---|---|---|---|---|------------|
|                         | Position   |                          |   |   |   |   |   |   |   |   |   |   |   |   |   |   |   | Position   |
| P2Y <sub>12</sub> mouse | 332        | K                        | K | K | G | Q | E | G | G | E | P | S | E | E | T | P | M | 347        |
| P2Y <sub>12</sub> rat   | 328        | K                        | K | K | G | Q | E | G | G | D | P | S | E | E | T | P | M | 343        |
| P2Y <sub>13</sub>       | 338        | Q                        | – | – | – | E | N | H | S | S | Q | T | D | N | I | T | L | 353        |
| P2Y <sub>14</sub>       | 321        | S                        | K | T | K | R | E | – | – | N | A | I | H | E | S | T | D | 336        |
| GPR87 mouse             | 343        | Q                        | S | V | R | R | S | E | V | R | I | Y | Y | D | Y | T | D | 358        |
| GPR171 mouse            | 306        | S                        | K | P | L | E | E | E | R | L | R | S | E | N | D | V |   | 319        |
| GPR34 mouse             | 348        | S                        | T | S | E | F | K | P | G | H | S | L | H | L | S | V | K | 365        |

Shaded cells indicate identical amino acid residues with respect to mouse P2Y<sub>12</sub> receptor.

**Table S2: Nucleotide sequences of primer pairs used in real-time PCR**

| Gene                    | Accession No. | Primer Position        | Primer Sequence                                      | Amplicon Size, bp | Ref.             |
|-------------------------|---------------|------------------------|------------------------------------------------------|-------------------|------------------|
| <b>P2Y<sub>1</sub></b>  | NM_012800     | 1235-1254<br>1504-1523 | ACGTCAGATGAGTACCTGCG<br>CCCTGTCTGTTGAAATCACAC        | 289               | 7, 8, 9          |
| <b>P2Y<sub>2</sub></b>  | NM_017255     | 1270-1293<br>1376-1399 | ACCCGCACCCTCTATTACTCCTTC<br>AGTAGAGCACAGGGTCAAGGCAAC | 130               | 10, 11           |
| <b>P2Y<sub>4</sub></b>  | NM_031680     | 263-284<br>537-556     | TGTTCCACCTGGCATTGTCAG<br>AAAGATTGGGCACGAGGCAG        | 294               | 7, 8, 9          |
| <b>P2Y<sub>6</sub></b>  | NM_057124     | 644-665<br>960-982     | TGCTTGCGGTGGTATGTGGAGTC<br>TGGAAGGCAGGAAGCTGATAAC    | 339               | 7, 8, 9          |
| <b>P2Y<sub>12</sub></b> | NM_022800.1   | 494-517<br>548-569     | TAACCATTGACCGATACCTGAAGA<br>ATCTTCGCACCCAAAAGATTGC   | 76                | Modified from 12 |
| <b>AQP2</b>             | BC128705.1    | 414-434<br>609-590     | ACCT GGCT GTCA ATGC TCTC<br>CCGG TGAA ATAG ATCC CAAG | 176               | #                |
| <b>AQP3</b>             | BC127490.1    | 96-115<br>226-245      | AGATGCTCCACATCCGCTAC<br>AAGCCAAGTTGATGGTGAGG         | 150               | #                |
| <b>AVP</b>              | NM_016992.2   | 1-21<br>129-149        | CAACACTACGCTCTCTGCTTG<br>TCTCAGCTCCATGTCGGATGT       | 150               | 13               |
| <b>β-Actin</b>          | NM_031144.2   | 18-37<br>205-224       | CACCCGCGAGTACAACCTTC<br>CCCATACCCACCATCACACC         | 207               | 9                |

# designed by us

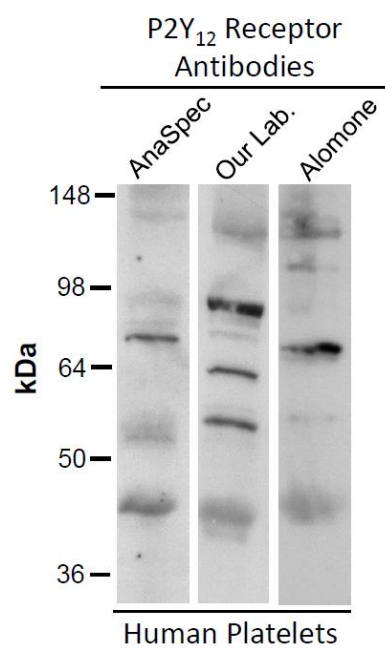

**Fig. S1.** Comparative evaluation of our P2Y<sub>12</sub>-R antibody with two commercial antibodies (AnaSpec, Inc. and Alomone Labs) on solubilized homogenates of human platelets in immunoblotting.

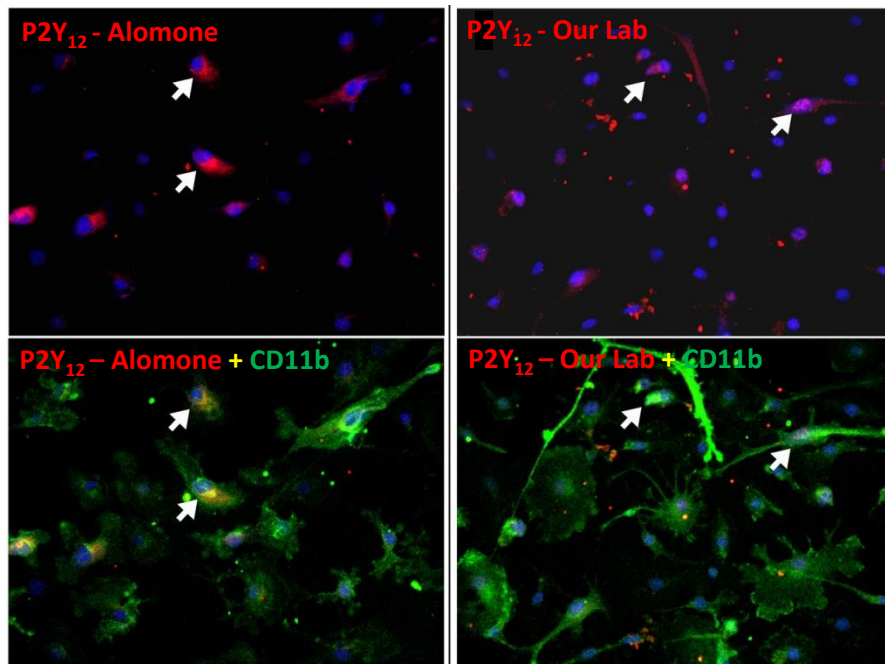

**Fig. S2. Comparative immunofluorescence evaluation of specificity of P2Y<sub>12</sub>-R antibodies in microglial cells.** Primary cultures of mouse microglial cells were incubated with antibodies against P2Y<sub>12</sub>-R and microglial marker CD11b. Upper row panels show labeling for P2Y<sub>12</sub>-R only (red). Lower row panels show merged images for P2Y<sub>12</sub>-R and CD11b (green). Antibody from the Alomone Labs was used in the left column panels. Right column panels were incubated with our P2Y<sub>12</sub>-R antibody. Nuclei are stained with propidium iodide. Arrows indicate P2Y<sub>12</sub>-R labeled cells in the upper and lower panels for each antibody.

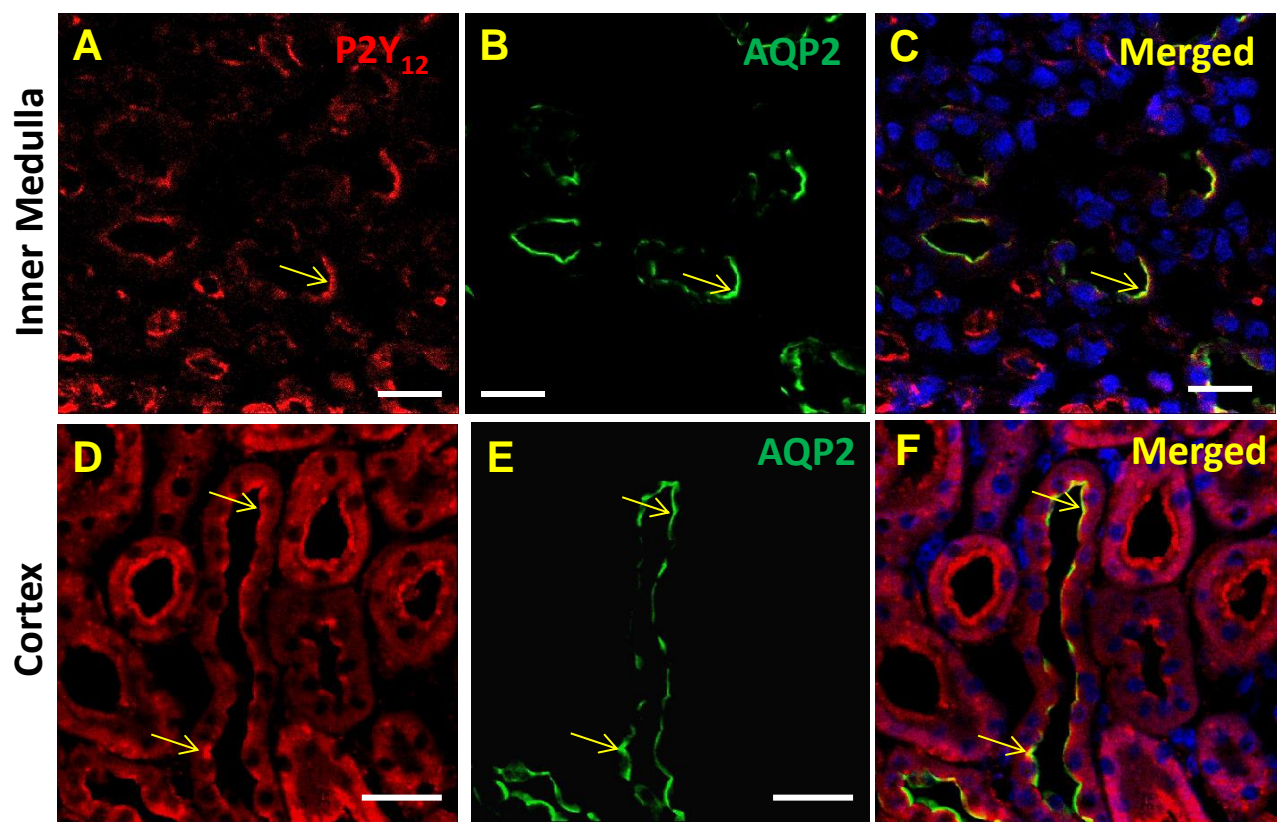

**Fig. S3. Immunofluorescence labeling of P2Y<sub>12</sub>-R in rat kidney using Alomone Labs' antibody.** (A-C) show labeling for P2Y<sub>12</sub>-R (red), AQP2 (green) or merging of both proteins (yellow) in medullary collecting ducts. (D) show labeling for P2Y<sub>12</sub>-R in proximal tubules, and a cortical collecting duct (arrows). (E) shows labeling for AQP2 in the cortical collecting duct of the same profile as in (D). (F) shows overlay of panels D & E showing merger of labeling for P2Y<sub>12</sub>-R and AQP2 in the cortical collecting duct (arrows). (Nuclei were stained with DAPI. Bars are 20  $\mu$ m in length.

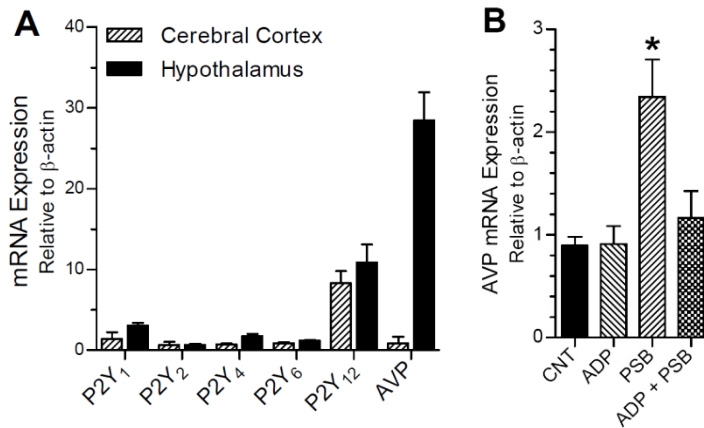

**Fig. S4. Expression of P2Y<sub>12</sub>-R in rat hypothalamus and the effect of its blockade on AVP gene expression in hypothalamic cells.** (A) Real-time RT-PCR results showing the mRNA expression of key P2Y receptor subtypes and AVP relative to the expression of  $\beta$ -actin in the cerebral cortex and hypothalamus ( $n = 3$  rats). (B) mRNA expression of AVP in the primary cultures of rat hypothalamic cells exposed to PSB-0739 (100 nM) or a combination of PSB-0739 and 2MeS-ADP (50  $\mu$ M) for 24 hours.  $N = 5$  culture wells per condition. \*significantly different ( $P < 0.01$  or  $0.05$ ) from all other groups. 2MeS-ADP – 2-methylthio ADP, is an agonist of P2Y<sub>12</sub>-R.

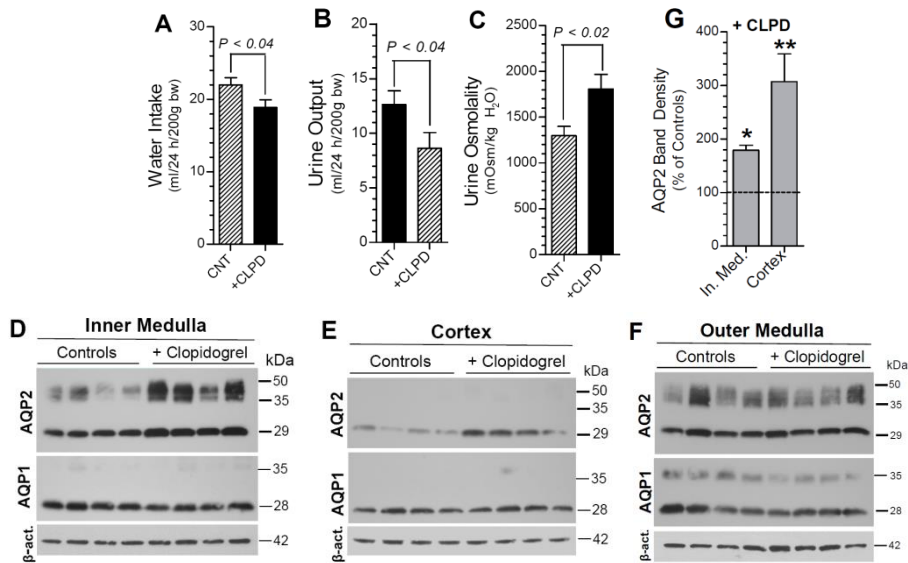

**Fig. S5. Effect of clopidogrel (CLPD) administration for 13 days in Sprague-Daley rats.**

(A) water intake; (B) urine output; (C) urine osmolality; Immunoblot profiles showing the protein abundances of AQP2, AQP1 and  $\beta$ -actin in the inner medulla (D), cortex (E) and outer medulla (F). (G) mean densities of AQP2 protein bands relative to  $\beta$ -actin in the inner medulla and cortex of clopidogrel-treated group plotted as percent of the respective values in the control group.  $N = 4$  rats/group. \* $P < 0.03$  and \*\* $P < 0.01$  vs. control group by unpaired  $t$  test.

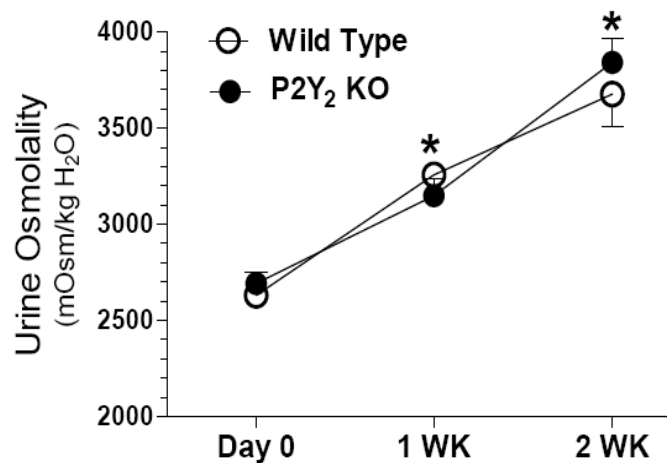

**Fig. S6. Lack of interaction of clopidogrel with P2Y<sub>2</sub> receptor.** P2Y<sub>2</sub> receptor knockout (KO) and wild type mice (N = 7 mice/genotype) were administered clopidogrel (80 mg/kg bw/day) in drinking water for 2 weeks (WK). Twenty-four hour urine osmolalities were monitored on days 0, and at the end of the first and second weeks. \*significantly different from the corresponding day 0 values.

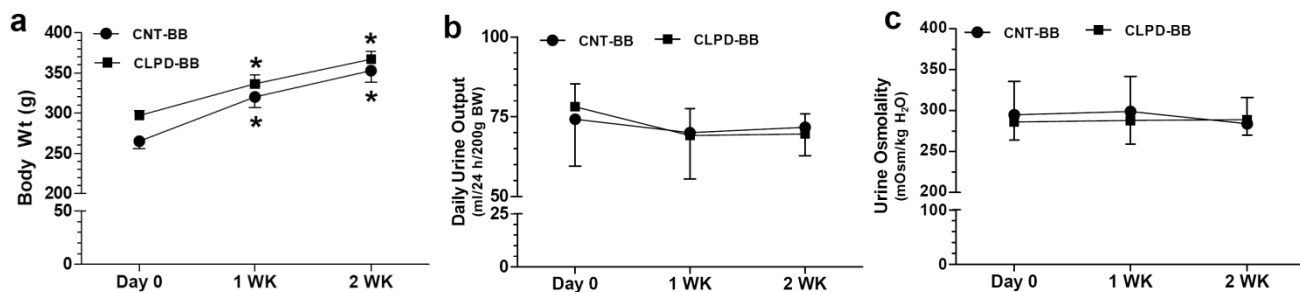

**Fig. S7: Lack of effect of clopidogrel in Brattleboro rats.** Brattleboro rats (BB) were administered clopidogrel (CLPD; 40 mg/kg bw/day) in drinking water for 2 weeks (WK). Control rats (CNT) did not receive clopidogrel. Body weights, and twenty-four hour urine osmolalities were monitored on days 0, and at the end of the first and second weeks. N = 4 rats per group.
